# Supplementary material
Source: Springer Nature journal article supplement (https://www.springermedizin.de/resource/supplementary/13014_2013_964_MOESM4_ESM.pdf/9634478)
Supplement: MOESM4 [file 9634478]

### Lateral

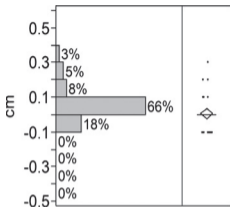

### Vertical

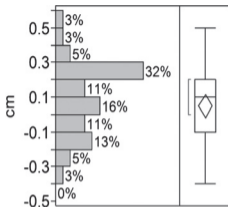

### Longitudinal

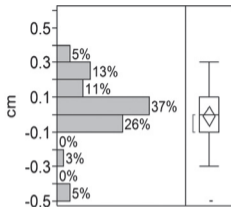

#### Test of Median

Hypothesized Value 0

Actual Estimate **0.00789**

DF 37

Std Dev 0.08505

#### Wilcoxon Signed-Rank

Test Statistic 7

Prob > |t| **0.5603**

Prob > t 0.2802

Prob < t 0.7198

#### Test of Median

Hypothesized Value 0

Actual Estimate **0.05**

DF 37

Std Dev 0.20762

#### Wilcoxon Signed-Rank

Test Statistic 75.5

Prob > |t| **0.1526**

Prob > t 0.0763

Prob < t 0.9237

#### Test of Median

Hypothesized Value 0

Actual Estimate **-0.0079**

DF 37

Std Dev 0.17302

#### Wilcoxon Signed-Rank

Test Statistic 7

Prob > |t| **0.8425**

Prob > t 0.4213

Prob < t 0.5787
